# Supplementary material
Source: ML conference proceedings conference paper supplement (https://openreview.net/forum?id=DSNJykzHF3)

Active edges

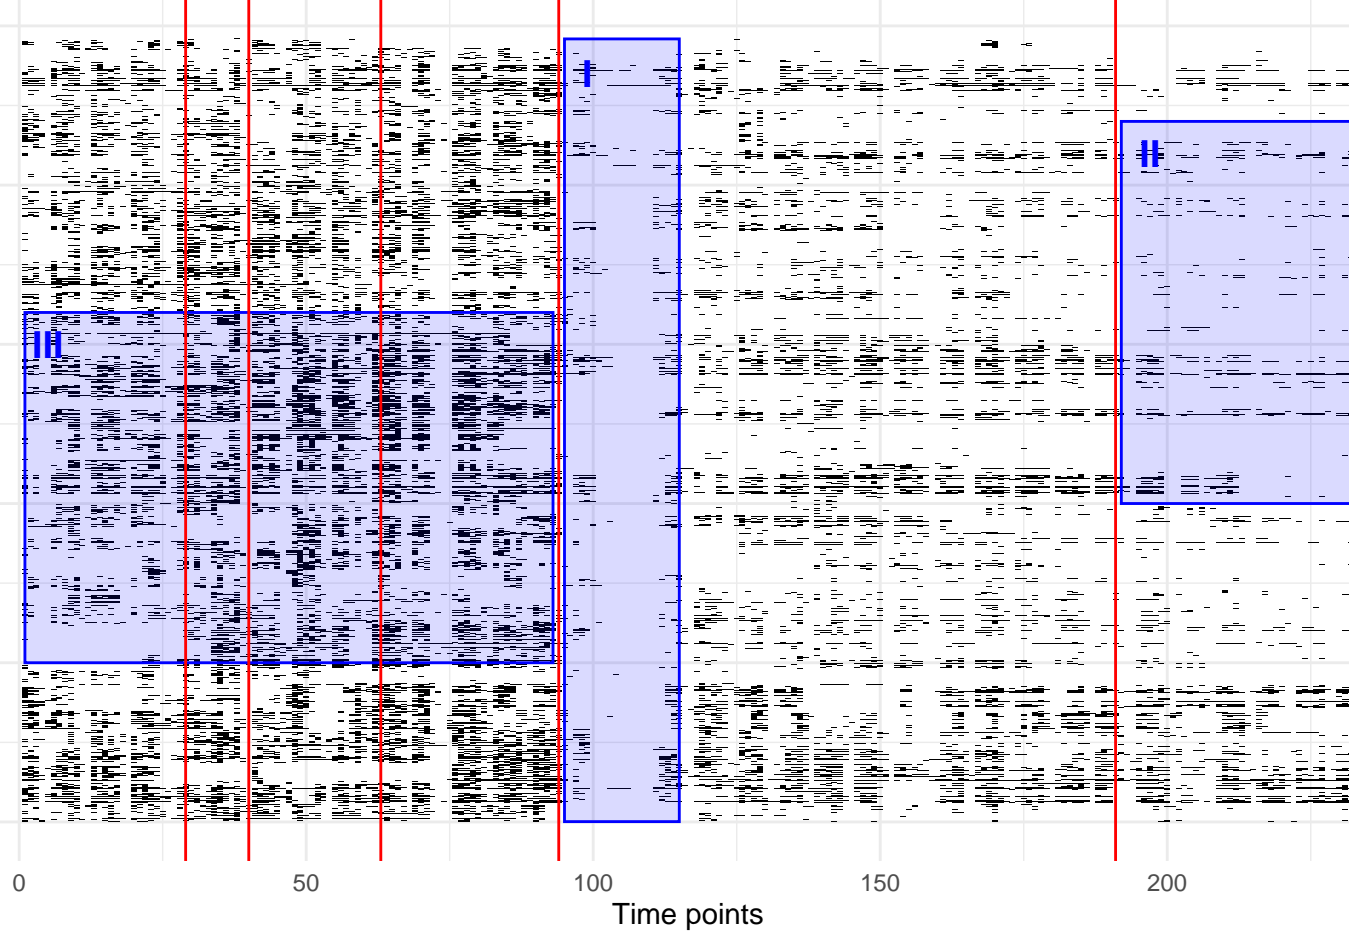

Supplement: supplementary_material [file attachment]

Active edges

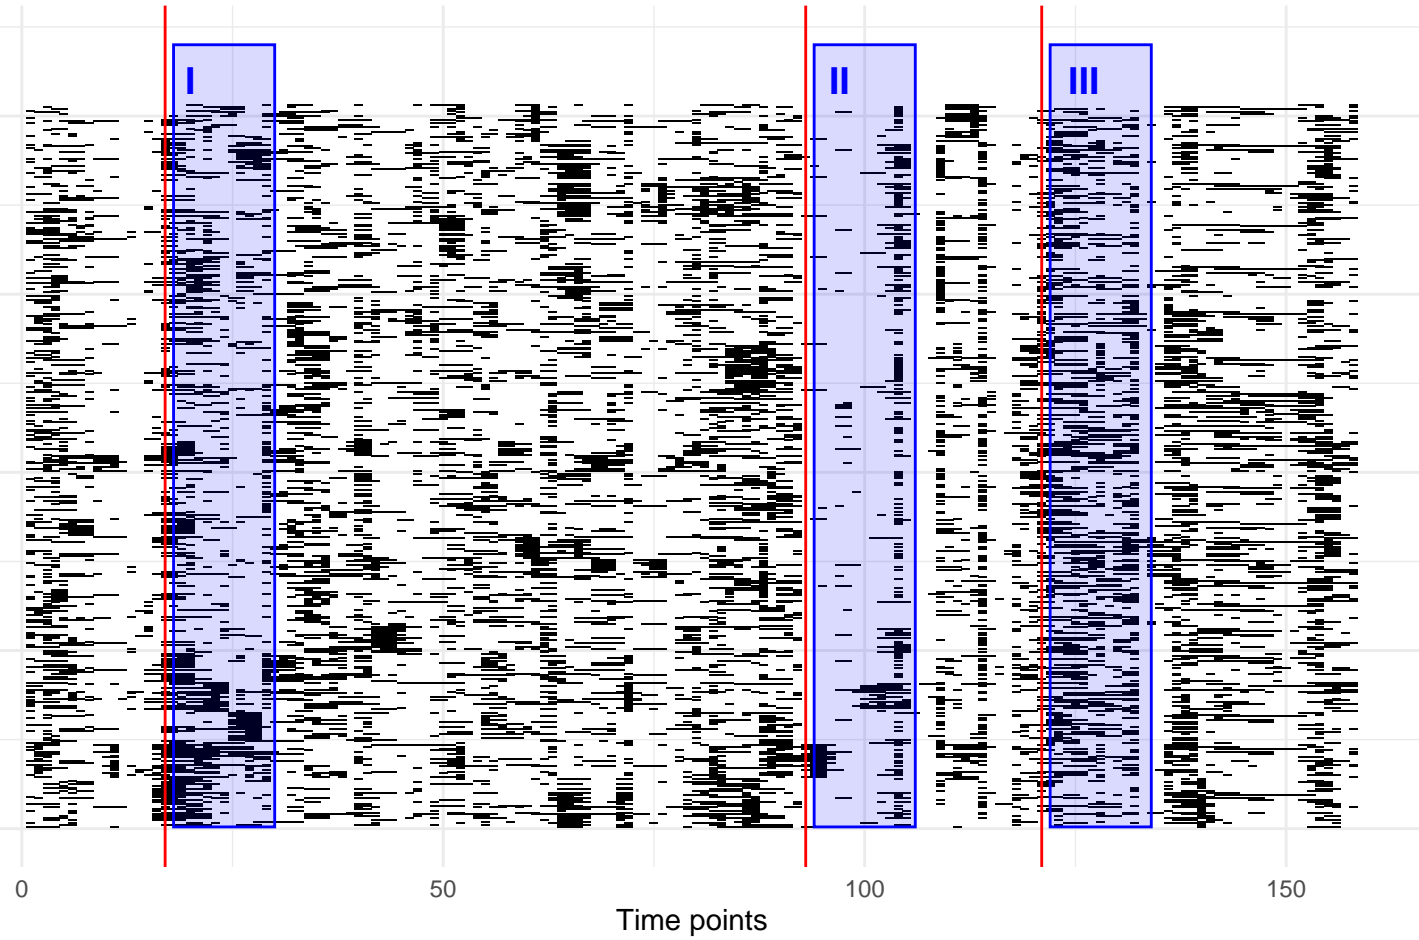

Supplement: supplementary_material [file attachment]

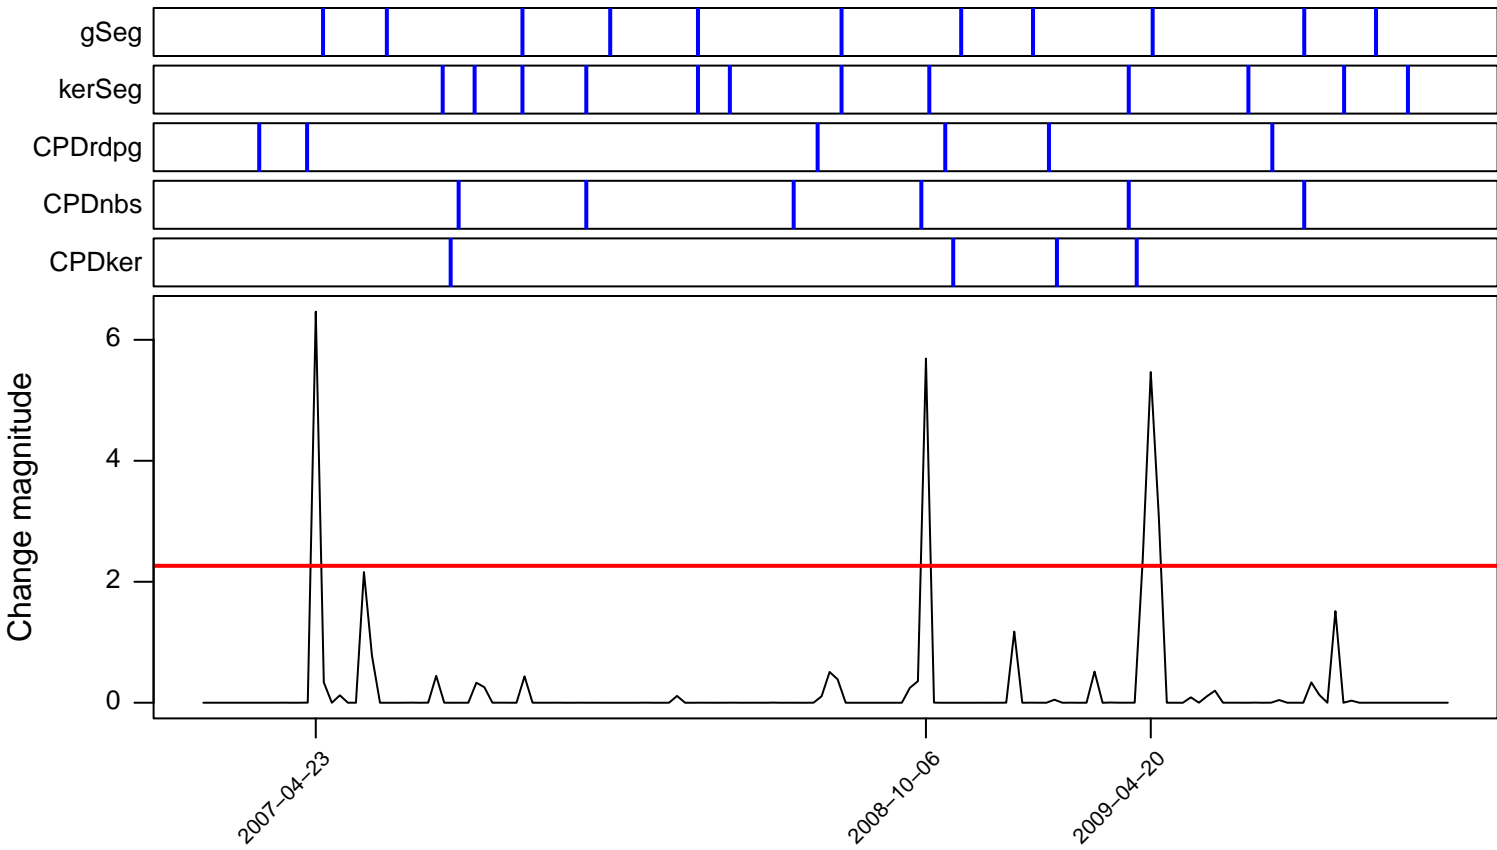

Supplement: supplementary_material [file attachment]

Change magnitude

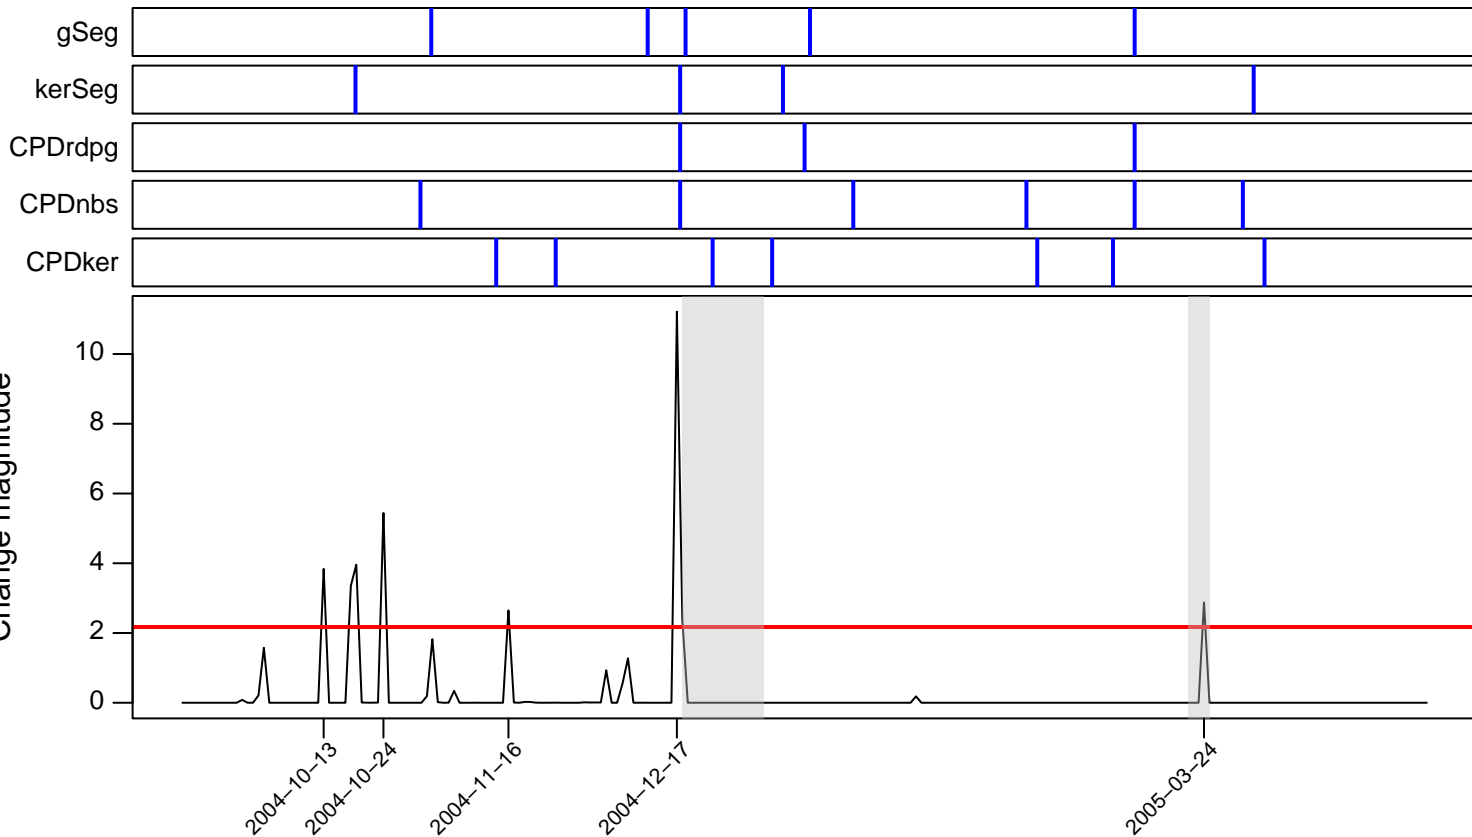

Supplement: supplementary_material [file attachment]
